1 **The alkaliphilic side of *Staphylococcus aureus***

2 Manisha Vaish<sup>a1\*</sup>, Amyeo Jereen<sup>a2</sup>, Amall Ali<sup>a3</sup>, Terry Ann Krulwich<sup>a4</sup>

3 <sup>a1</sup>Department of Pharmacological Sciences, Icahn School of Medicine at Mount Sinai,  
4 New York, NY 10029

5

6 \* To whom correspondence may be addressed. Address: Department of  
7 Pharmacological Sciences, Icahn School of Medicine at Mount Sinai, Box 1603, 1 G.  
8 Levy Place, New York, NY 10029; Tel.: 660-349-5956; email:  
9 vaish.manisha@gmail.com

10

11 **Keywords:** cation/proton antiporter | CPA1 | NhaC3 | *Staphylococcus aureus*

12 **Running title:** Roles of CPA1 and NhaC family antiporters in *S. aureus*

13 The authors declare no conflict of interest.

14 <sup>2</sup>A.J. present address: 12901 Bruce B Downs Blvd, Tampa, FL 33612

15 <sup>3</sup>A.A. present address: 98 Morningside avenue, Apt 54, New York, NY 10027

16 <sup>4</sup>TAK present address: 1160 Park Avenue, New York, NY 10128-1212

17 **Email (E) and phone (ph) numbers of all co-authors**

18 Jereen: E: [amyeo.jereen@gmail.com](mailto:amyeo.jereen@gmail.com); ph: none

19 Ali: E: [amallali0007@gmail.com](mailto:amallali0007@gmail.com); ph: 646-371-2226

20 Krulwich: E: [terry.krulwich@gmail.com](mailto:terry.krulwich@gmail.com); ph: 646 240-7873

## 21 **Abstract**

22 The genome of *Staphylococcus aureus* has eight structurally distinct cation/proton  
23 antiporters (CPA) that play significant roles in maintaining cytoplasmic pH and ions in  
24 extreme conditions. These antiporters enable *S. aureus* to persist under conditions that  
25 are favorable to the bacterium but unfavorable to animal host including humans. In this  
26 study, we report physiological roles and catalytic properties of NhaC (NhaC1, NhaC2  
27 and NhaC3), CPA1 (CPA1-1 and CPA1-2) and CPA2 family antiporters and how these  
28 antiporters crosstalk with Mnh1, a CPA3 family antiporter, recently shown to play  
29 important roles in virulence and pH tolerance. Catalytic properties of antiporters were  
30 determined by Na<sup>+</sup>/H<sup>+</sup> and K<sup>+</sup>/H<sup>+</sup> antiport assays using everted membrane vesicles of a  
31 CPA-deficient *E. coli* KNaBC host. NhaC and CPA1 candidates exhibited Na<sup>+</sup>/H<sup>+</sup> and  
32 K<sup>+</sup>/H<sup>+</sup> antiporter activity in the pH range between pH 7 to 9.5 but did not show significant  
33 role in halotolerance and osmotolerance alone. Interestingly, NhaC3 exhibited  
34 significant antiporter activity at alkaline pH and play major roles in pH and salt tolerance.  
35 CPA2 neither exhibited Na<sup>+</sup> or K<sup>+</sup>/H<sup>+</sup> exchange nor showed any active role in pH and salt  
36 tolerance. Double deletion of *mnhA1* with *nhaC1*, *nhaC3*, *cpa1-1* or *cpa1-2* respectively,  
37 made *S. aureus* severely sensitive at pH 7.5 under stress conditions indicating  
38 synergistic relationship of Mnh1 with these antiporters. The functional loss study of  
39 these antiporters in *in-vivo* mouse infection model, *nhaC3* deletion showed significant  
40 loss of *S. aureus* virulence. Altogether, the current study indicates NhaC3 as a potential  
41 target against *S. aureus* virulence under extreme pH and salt conditions.

## 42 **Importance**

43 In this study, we established catalytic properties and physiological roles of *S. aureus*  
44 NhaC, CPA1 and CPA2 family antiporters and their importance under salt and alkaline  
45 stress conditions. Except CPA2, all five antiporters of both families were active for  
46 Na<sup>+</sup>/H<sup>+</sup> and K<sup>+</sup>/H<sup>+</sup> exchange. CPA1-1 showed significant role in pH homeostasis at pH  
47 7.5 whereas CPA1-2 and NhaCs were major contributors to halotolerance and  
48 osmotolerance at alkaline pH. The severity of growth deficit in double knockouts of  
49 *mnhA1* with each of *nhaC1*, *nhaC2*, *nhaC3*, *cpa1-1* or *cpa1-2* establishes their  
50 synergistic relationship in regulating pH and salt homeostasis. Deletion of *cpa1-1*, *cpa1-*  
51 *2* and *nhaC1*, *nhaC2*, and *nhaC3* were assessed in mice model and NhaC3 was shown  
52 to play a major role in *S. aureus* virulence.

### 53 **Introduction**

54 *S. aureus* has a robust defense mechanism that ensures its survival in extreme stress  
55 conditions within a host as well as in the environment. It can successfully colonize in  
56 stomach, small intestine, skin, and external nares where extreme pH and salt conditions  
57 exist. Adaptation of *S. aureus* in diverse niches leads to infection ranging from minor  
58 skin infections like abscesses and boils to life threatening diseases like osteomyelitis,  
59 endocarditis and food poisoning etc. (1).

60 The survival of *S. aureus* in high salt and alkaline environment highly depends on the  
61 active secondary transporters on the cell membrane. This group of secondary  
62 transporters belongs to monovalent cation/proton antiporter (CPA) family. They take up  
63 external protons utilizing inward proton gradients generated by respiration or other  
64 specific proton pumps. Concomitantly, these antiporters catalyze efflux of cytoplasmic

65 cations that are potentially toxic, e.g.  $\text{Na}^+$ ,  $\text{Li}^+$  or excess  $\text{K}^+$  (2). Such antiporters were  
66 first observed in alkaliphilic *Bacillus firmus* OF4 (later renamed *B. pseudofirmus* OF4),  
67 were named  $\text{Na}^+/\text{H}^+$  antiporters type C (NhaC) (3) and now have 4 numbered sub-sets,  
68 e.g. containing antiporter variants such as the  $\text{H}^+$ -malate/ $\text{Na}^+$ -lactate antiporters or new  
69 species (4). These antiporters play major role in proton retention and in maintaining  
70 intra-cellular pH homeostasis at highly alkaline conditions.

71 Extremophiles inhabit extreme alkaline environments where  $\text{pH} > 12$  such as soda lakes  
72 and in industrial settings such as indigo dye plants, sewage plants, and underground  
73 water etc. (5, 6). These extreme alkaliphiles use many of the same strategies  
74 observed in neutralophiles, further adapting them to respond to more extreme  
75 challenges. Typically, proteins involved in the pH homeostasis mechanisms of  
76 extremophiles are constitutively expressed, so that these bacteria are prepared for  
77 sudden shifts to the extreme end of the pH range. Similarly, neutralophiles maintain  
78 substantially more acidic cytoplasmic pH than the external pH at the higher end of their  
79 pH range. Bacteria have additional strategies for surviving without growth during periods  
80 of exposure to pH values that are outside their growth range. Survival without growth is  
81 assessed by the resumption of growth on return of the bacteria to a permissive pH (i.e.,  
82 a near-neutral pH for neutralophiles). For example, *S. aureus*, a neutralophile that can  
83 grow at external pH values of 5.5 to 9.5 but generally maintains its cytoplasmic pH  
84 between 7.4-7.7 (7). Enteric bacteria such as *Escherichia coli* and *Salmonella* spp.  
85 survive passage through the stomach but do not grow in that niche (2, 8) and *E. coli*  
86 survives exposure to alkaline sea water but does not grow (9).

87 Survival and growth under acidic or alkaline stress involves changes in the cell  
88 structure, metabolism, and transport patterns. Cell membrane transporters play a major  
89 role in maintaining homeostasis within the cell during pH shift in the environment. The  
90 groups of secondary transporters, mainly  $\text{Na}^+/\text{H}^+$  antiporters, have been found in many  
91 alkaliphiles and pathogenic bacteria important for their physiology, ecology and  
92 pathogenesis. For alkaliphiles,  $\text{Na}^+/\text{H}^+$  antiporters are not essential to maintain  
93 alkaliphilic nature but play an important role in regulating cytoplasmic pH at higher  
94 environment pH (10, 11). In some of the major pathogens, cation/proton antiporters  
95 have been linked with virulence. Transporters in *E. coli* B2 strain have an important role  
96 in extra intestinal virulence without strong effect on commensalism and these could  
97 serve as drug target against *E. coli* infections (12, 13). The NhaA-type  $\text{Na}^+/\text{H}^+$  antiporter  
98 of the Bubonic plague pathogen, *Yersinia pestis*, has been shown to be essential for its  
99 virulence (14). The NhaA-type  $\text{Na}^+/\text{H}^+$  antiporter of *Vibrio cholera* has been shown to be  
100 important for the viability of the pathogen in its  $\text{Na}^+$  rich biotope (15). NhaP2, a  
101  $\text{K}^+/\text{Na}^+/\text{H}^+$  antiporter of *Vibrio cholera*, has been shown to be important for its adaptation  
102 to acidic environment (16, 17). Recently, we found that a multi-drug resistant pathogen  
103 *S. aureus* seven-subunit cation/proton antiporter Mnh1 of CPA3 family plays important  
104 role in diminishing sodium toxicity and maintaining pH homeostasis at neutral pH. We  
105 found Mnh1 to be essential for virulence and pathogenesis of *S. aureus* in the *in-vivo*  
106 mice infection model, and therefore it could be a potential therapeutic target (18).

107 In this study, we are reporting NhaC, CPA1 and CPA2 family antiporters with their  
108 catalytic properties and roles in physiology, ecology, and pathogenesis of *S. aureus* for  
109 the first time.

## 110 **Results**

### 111 **Characterization of catalytic properties of NhaC, CPA1 and CPA2 antiporters**

112 Catalytic properties of NhaC1, NhaC2, NhaC3, CPA1-1, CPA1-2 and CPA2 were  
113 determined by the antiporter assay. These six *S. aureus* Newman antiporters were  
114 cloned into inducible pBAD vector and transformed into the cation/proton antiporter  
115 deficient *E. coli* KNabC strain, keeping empty pBAD vector as control. Everted  
116 membrane vesicles were prepared using very high pressure and antiport assays were  
117 performed at pH range 7.0-9.5. NhaC candidates exhibited catalytic activities for Na<sup>+</sup>/H<sup>+</sup>  
118 and K<sup>+</sup>/H<sup>+</sup> exchange at neutral to alkaline pH ranging 7.0-9.5. They exhibited modest  
119 activities in the pH range between 7.0 to 8.0 in presence of high salt concentration (1 M  
120 NaCl or 1M KCl). Increasing pH accelerated antiport activity and the activity was  
121 optimum at pH 9.5 (Fig 1). At this pH, NhaC3 efficiently showed Na<sup>+</sup>/H<sup>+</sup> or K<sup>+</sup>/H<sup>+</sup>  
122 exchange at minimal salt concentration, 0.5 mM of (NaCl or KCl). NhaC1 and NhaC2  
123 were moderately active at pH 9.5 but less efficient than NhaC3 (Fig 1). In table 1,  $K_m$   
124 values for catalytic activities of NhaC1, NhaC2 and NhaC3 were calculated at optimum  
125 pH 9.5 using *E. coli* as a host.

126 Similar to NhaCs, CPA1 candidates actively exchanged Na<sup>+</sup>/H<sup>+</sup> and K<sup>+</sup>/H<sup>+</sup> between pH  
127 values 7 to 9.5. In Fig 2, raw data of antiport activities indicates that CPA1-1 exhibited  
128 antiporter activity near neutral pH whereas CPA1-2 was active at larger range of pH  
129 between 7 -9.5 and had robust activity > 93% dequenching at pH 9.0 in presence of  
130 minimal salt concentration of 0.5 mM of Na<sup>+</sup> or K<sup>+</sup> salt, exhibiting highest activity among  
131 whole cohort of antiporters. The antiport activity profile is mentioned in Table 2 which

132 includes  $K_m$  values of each CPA1-1 and CPA1-2 at their optimal pH, 7.5 and 9.0  
133 respectively. CPA2 did not exhibit any antiport activity for  $\text{Na}^+$  or  $\text{K}^+/\text{H}^+$  exchange within  
134 the pH range 7-9.5 (data not shown). This indicates the possibility that CPA2 might  
135 have catalytic activity other than antiporter.

### 136 **Comparison of physiological roles of NhaC, CPA1 and CPA2 antiporters under** 137 **stress conditions**

138 In order to explore the contribution of NhaC candidates in *S. aureus* growth and  
139 physiology, single, double and triple knockout strains:  $\Delta nhaC1$ ,  $\Delta nhaC2$  and  $\Delta nhaC3$ ;  
140  $\Delta nhaC1\Delta nhaC3$  and  $\Delta nhaC1\Delta nhaC2\Delta nhaC3$  were constructed in Newman. Growth  
141 experiments were conducted in Luria-Bertani broth medium with and without  
142 supplemented salt conditions (LB0). None of the mutants showed growth defect at pH  
143 7.5 and 8.5 in absence of added salt and, at pH 9.5  $\Delta nhaC3$ ,  $\Delta nhaC1\Delta nhaC3$  and  
144  $\Delta nhaC1\Delta nhaC2\Delta nhaC3$  exhibited significant growth deficit (Fig 3A). When growth  
145 media was supplemented with 1 M of  $\text{Na}^+$  or  $\text{K}^+$  salt,  $\Delta nhaC3$ , double and triple  
146 knockouts were found to be sensitive at pH 8.5. The complete loss of viability was  
147 observed in all knockouts at pH 9.5 supplemented with 1 M of sodium salt (Fig 3A). This  
148 result was consistent with catalytic properties of NhaC antiporters at pH 9.5 and  
149 indicated their major role in alkali tolerance of *S. aureus*.

150 In the previous study (18) it was reported that Mnh1 significantly contributes in pH  
151 homeostasis at pH 7.5 and Mnh2 was active at higher pH range. However, it was still  
152 unclear that how rest of the antiporters in cohort regulates pH tolerance and salt  
153 tolerance in extreme conditions. Therefore, it was interested to investigate how *S.*

154 *aureus* regulates pH homeostasis by NhaCs that exhibit catalytic activity at alkaline pH  
155 and orchestrate with Mnh1 that exchange  $\text{Na}^+/\text{H}^+$  at lower pH under stress conditions. In  
156 order to explore this phenomenon, *nhaC1*, *nhaC2* and *nhaC3* were deleted with *mnhA1*  
157 respectively to construct double mutant strains. Severe growth defects were observed in  
158  $\Delta nhaC1\Delta mnhA1$ ,  $\Delta nhaC2\Delta mnhA1$ , and  $\Delta nhaC3\Delta mnhA1$  knockouts in various stress  
159 conditions. Increase in pH exacerbated growth defects with supplemented sodium or  
160 potassium salt. By the addition of 1 M sodium salt in growth medium at pH 7.5, growth  
161 defects were significantly higher in  $\Delta nhaC1\Delta mnhA1$  and  $\Delta nhaC3\Delta mnhA1$  in  
162 comparison to  $\Delta mnhA1$  or  $\Delta nhaC1$  and  $\Delta nhaC3$  alone (Fig 3B). Increasing pH to 8.5  
163 increased the severity of the growth deficit in these double knockouts. Complementation  
164 of *nhaC1* and *nhaC3* genes into double mutant strains using pOS1 vector, restored the  
165 growth of these mutants at  $\Delta mnhA1$  level under tested conditions (Fig 3C). The data  
166 shown above clearly indicate that Mnh1 and NhaCs synergistically play an important  
167 role to support *S. aureus* in coping sodium toxicity and alkaline pH.

168 In addition to explore the role of CPA1 family candidates in *S. aureus* physiology, single  
169 knockout of *cpa1-1* and *cpa1-2*;  $\Delta cpa1-1$  and  $\Delta cpa1-2$  and double knockout;  $\Delta cpa1-$   
170  $1\Delta cpa1-2$  were constructed in Newman. Single knockouts of *cpa1-1* and *cpa1-2* have  
171 mild growth defects at pH 7.5 and 8.5; however, double deletion of both genes together  
172 had severe consequence in pH tolerance of *S. aureus* (Fig 4A). None of the mutant  
173 strains, single or double knockouts of CPA1 were found sensitive to sodium or  
174 potassium stress at pH 7.5 and 8.5. This data indicates that salt tolerance of *S. aureus*  
175 was not affected at pH 7.5- 8.5, in absence of CPA1 family candidates, specially CPA1-  
176 2, which exhibited highest antiport activity at wider pH range, and the cation/proton



177 exchange was efficiently overtaken by another antiporter in cohort (Fig 7). To find the  
178 synergistic relationship between CPA1 candidates and Mnh1, *cpa1-1* and *cpa1-2* were  
179 deleted with *mnhA1* respectively to construct double knockouts. In absence of  
180 supplemented Na<sup>+</sup> or K<sup>+</sup> salt,  $\Delta$ *cpa1-1* $\Delta$ *mnhA1* and  $\Delta$ *cpa1-2* $\Delta$ *mnhA1* exhibited severe  
181 growth defect at pH 7.5 and the severity of growth defect was further enhanced at pH  
182 8.5. Addition of 1 M Na<sup>+</sup> salt in growth medium at pH 7.5 exhibited severe consequence  
183 on growth deficit in  $\Delta$ *cpa1-1* $\Delta$ *mnhA1* and  $\Delta$ *cpa1-2* $\Delta$ *mnhA1* which got worsened at pH  
184 8.5 (Fig 4B). The growth deficit in double knockouts were reversed upto *ΔmnhA1* level  
185 by complementing *cpa1-1* and *cpa1-2* genes in their respective double knockout strains  
186 (Fig 4C). There was no growth deficit reported in  $\Delta$ *cpa2* mutant strain at any stress  
187 conditions indicating no obvious role of CPA2 antiporter in pH or salt tolerance (Fig 4A).

### 188 **Expression profiles of NhaC, CPA1 and CPA2 antiporters as function of pH**

189 We compared expression level of three NhaCs, two CPA1, two CPA3 (Mnh1 and Mnh2)  
190 and CPA2 antiporters grown in LB0 media without any supplemented Na<sup>+</sup> or K<sup>+</sup> salt  
191 using culture at log phase. The wild type Newman strain was grown in pH 6.0, 7.5, and  
192 9.5 to compare the fold change of antiporter genes in acidic, neutral and alkaline pH  
193 conditions. CPA1-2, Mnh2, NhaC1, NhaC2, and NhaC3 exhibited higher expression at  
194 pH 9.5 and expression of NhaC3 was highest among all eight CPAs. The expression  
195 profile of these antiporters was consistent with their antiporter activities at alkaline pH.  
196 In contrast, Mnh1 and CPA1-1 were expressed at acidic side of pH. CPA2 did not show  
197 any change in expression level at acidic or alkaline pH (6.0 and 9.5) (Fig 5). These data  
198 sets were analyzed using quantitative PCR assay on each of eight antiporters in *S.*  
199 *aureus* Newman.

## 200 **Importance of NhaC and CPA1 antiporters in pathogenesis of *S. aureus***

201 The contribution of NhaC1, NhaC2, NhaC3, CPA1-1 and CPA1-2 in *S. aureus*  
202 pathogenesis was evaluated by systemic infection of isogenic mutant strain using  
203 murine model and Newman wild type as a control of virulence. Strains with  $\Delta cpa1-1$ ,  
204  $\Delta cpa1-2$ ,  $\Delta nhaC1$  and  $\Delta nhaC2$  deletions exhibited virulence similar to Newman wild  
205 type, whereas strain with  $\Delta nhaC3$  deletion showed marked attenuation of virulence (Fig  
206 6A). To confirm the virulence defect observed in  $\Delta nhaC3$  strain is due to lack of  
207 functional *nhaC3*, complemented strain of wild type *nhaC3* in  $\Delta nhaC3$  mutant strain was  
208 constructed by using pOS1 plasmid as mentioned in previous studies (18, 19). The  
209 virulence defect was reversed with the restoration of wild type *nhaC3* in  $\Delta nhaC3$  mutant  
210 strain (Fig 6B). The survival data shown in Fig 6C was consistent with ~ 3.3-log  
211 reduction in bacterial burden observed in kidneys of mice infected with  $\Delta nhaC3$  as  
212 compared to mice infected with wild type *nhaC3*.

## 213 **Methods and Materials**

### 214 **Bacterial strains, plasmids and primers**

215 The bacterial strains, plasmids and primers used in this study are listed in Table 3 and  
216 4.

### 217 **Growth conditions**

218 *S. aureus* strains were routinely grown in a modified version of Luria-Bertani broth (LB),  
219 designated as LB0, which is LB without added NaCl or KCl. Cultures from frozen stock  
220 were incubated at 37°C with shaking at 225 rpm. Erythromycin at 2.5 µg/ml, and

221 chloramphenicol 10 µg/ml were added in the medium to grow *S. aureus* for various  
222 plasmid selections.

### 223 **Growth curve experiments**

224 Growth experiments were done according to our previous study (18). Briefly, glycerol  
225 stocks of *S. aureus* wild type and mutant strain were inoculated in LB0 medium, pH 7.5,  
226 and grown for 16 h at 37°C with shaking at 225 rpm prior to growth experiments.  
227 Cultures were grown overnight and normalized to an OD<sub>600</sub> of 0.2 with unbuffered LB0  
228 medium. Ten micro liters of pre-cultures at an OD<sub>600</sub> of 0.2 was passed into 190 µl of  
229 corresponding medium in 96-well microplates starting with OD<sub>600</sub> of 0.01 for all growth  
230 conditions. Microplate lids were then carefully sealed with 1.2 X 40 cm silicone rubber  
231 tape and incubated at 37°C with shaking at 225 rpm in a BioTek Power Wave HT  
232 microplate spectrophotometer for 24 h. OD<sub>600</sub> readings were collected every hour.  
233 Growth curves were calculated as averages of at least three independent experiments  
234 done in triplicate repeats.

### 235 **Construction of marker less deletions in *S. aureus* by allelic replacement**

236 In frame deletions of target genes were generated by using pMAD according to  
237 previously published methods (20). Briefly, ~1-kb PCR products on either side of the  
238 sequence to be deleted were generated and fused by gene SOEing (21). 2-kb product  
239 was ligated into pMAD and transformed into *E. coli*. After plasmid isolation and  
240 sequence verification, the construct was moved into *S. aureus* RN4220 by  
241 electroporation. After isolation from RN4220, the construct was electroporated into the  
242 target *S. aureus* strain. The plasmid was recombined into the chromosome by

243 inoculating a liquid culture for 2 h at the permissive temperature (28°C), followed by  
244 overnight inoculation at the restrictive temperature (42°C) and plating of dilutions on  
245 LB0 agar containing erythromycin. Merodiploid clones (containing the plasmid  
246 recombined into the chromosome) were verified by PCR. To resolve the plasmid out of  
247 the chromosome and to generate candidate deletion mutants, liquid cultures of  
248 merodiploids were incubated at 28°C without selection and transferred by 1:100  
249 dilutions for 7 days before being plated on LB0 agar. Candidate mutants were screened  
250 for loss of erythromycin resistance (confirming loss of the plasmid), and PCR and  
251 sequencing was used to confirm exclusive presence of the deleted allele.

252 **Preparation of the total RNA and cDNA from *S. aureus* Newman and relative**  
253 **quantification of RNA transcripts by qPCR**

254 RNA was prepared according to a method described previously (22). Newman wild type  
255 was inoculated in 50 ml of LB0 medium and grown up to an OD<sub>600</sub> of 0.9 at 37°C.  
256 Briefly, eight milliliters of culture was added to 8 ml of RNA Protect bacteria reagent  
257 (Qiagen) in 50-ml sterile tubes and then vortexed immediately for 5 sec and incubated  
258 at room temperature for 5 min. Cells were harvested by centrifugation (4,700 rpm, 21°C,  
259 and 10 min), the supernatant was poured off, and then the tube was inverted on paper  
260 towel for 10 sec. Pellets were stored at -80°C overnight. The following day, RNA was  
261 isolated using an miRNeasy purification kit (Qiagen) for subsequent steps as described  
262 in (Vaish et al 2018). Samples were run in triplicate, and a no-template control and a no-  
263 reverse transcriptase control were run to ensure absence of DNA contamination.  
264 Primers used in this study are mentioned in table 4. Data were analyzed using SDS,  
265 version 2.2.1, software (Applied Biosystems, USA).

## 266 **Antiporter assays**

267 Antiporter assays were conducted in everted membrane vesicles prepared from  
268 transformants of the triple antiporter-deficient *E. coli* KNabc strain expressing the empty  
269 vector, pBAD, or Newman *cpa1-1*, *cpa1-2*, *cpa2*, *nhaC1*, *nhaC2* and *nhaC3* genes. The  
270 gene of interest was placed into the pBAD vector downstream of the araBAD promoter,  
271 which drives expression of the gene of interest in response to 0.002% L-arabinose  
272 added in early exponential phase of the culture (23). The everted membrane vesicles  
273 are oriented in such a manner that part of the membrane that is exposed outside the  
274 bacterial cells comes inside the vesicles. The transformants were grown for 3 hours  
275 after inducing with 0.002% arabinose and then frozen in liquid nitrogen and stored at  
276  $-80^{\circ}\text{C}$ . Preparation of vesicles from the *E. coli* transformants was conducted using a  
277 French press as described earlier (24). The vesicles were used immediately after  
278 preparation, without being frozen. The assays also followed a protocol used earlier with  
279 the same buffer and pH conditions. Acridine orange was used as the  $\Delta\text{pH}$  probe. The  
280 measurement was conducted using an RF-5301 PC Shimadzu Spectro  
281 fluorophotometer equipped with a stirrer, with excitation at 420 nm and emission at 500  
282 nm (both with a 10-mm slit). When the respiratory chain is energized by succinate, the  
283 respiratory chain starts pumping protons inside the vesicles (as vesicles are everted).  
284 The initiation of proton motive force generation is indicated for specific experiments.

## 285 **Complementation of markerless deletions**

286 To complement  $\Delta\text{mnhA1}\Delta\text{cpa1-1}$ ,  $\Delta\text{mnhA1}\Delta\text{cpa1-2}$ ,  $\Delta\text{mnhA1}\Delta\text{nhaC1}$ ,  $\Delta\text{mnhA1}\Delta\text{nhaC3}$   
287 and  $\Delta\text{nhaC3}$  with wild type Newman *cpa1-1*, *cpa1-2*, *nhaC1* and *nhaC3* respectively,

288 genes were amplified by PCR and inserted into pOS1 vector (25). Briefly, *cpa1-1*, *cpa1-*  
289 *2*, *nhaC1* and *nhaC3* were amplified using primers mention in table 4 and then ligated  
290 into pOS1 vector at their respective restriction sites resulting in transformation in *E. coli*  
291 using ampicillin for selecting colonies. Plasmid construct were isolated and sequenced  
292 verified. After that, these constructs were transformed into *S. aureus* RN4220 by  
293 electroporation followed by electroporating constructs in appropriate target mutants of  
294 *S. aureus* Newman.

### 295 **Murine systemic infection**

296 Animal experiments were performed by protocol approved by Mount Sinai Institutional  
297 Animal Care and Use Committee. For systemic infections, 5 weeks old female swiss  
298 webstar mice, N=10, were injected with  $1 \times 10^7$  CFU/ml intravenously in tail using  
299 Newman wild type, isogenic mutant strains of  $\Delta cpa1-1$ ,  $\Delta cpa1-2$ ,  $\Delta nhaC1$ ,  $\Delta nhaC2$  and  
300  $\Delta nhaC3$  and complemented strain  $\Delta nhaC3/pOS1::nhaC3$  (Fig 6A,B). Mice were  
301 monitored for acute infection and sign of morbidity upto seven days and survival curve  
302 were plotted over time using Prism software. Bacterial load experiment was done on  
303 kidney tissues harvested ~96 hours of post infection and euthanizing mice with CO<sub>2</sub>  
304 when acute infection signs appears (Fig 6C).

### 305 **Discussion**

306 *S. aureus* is a neutralophile and can act like an alkaliphile in extreme conditions inside  
307 host as well as in the environment. The viability of *S. aureus* at alkaline pH highly  
308 depends on secondary transporters, which maintain inside cytoplasmic pH near 7.5-7.7.  
309 This study confirms that *S. aureus* NhaC and CPA1 family candidates are secondary

310 antiporters that are involved in  $\text{Na}^+$  and/or  $\text{K}^+$  efflux in exchange of protons. The  
311 existences of NhaC type antiporters are prevalent in large groups of pathogenic and  
312 non-pathogenic bacterial species as such as *L. hongkongensis*, *C. violaceum*, *N.*  
313 *meningitidis*, *N. gonorrhoeae*, *Haemophilus influenzae* shown to have important role in  
314 alkali-tolerance (26-28). Ivey DM et. al. (3) observed the role of NhaC for the first time in  
315 non-pathogenic *B. pseudofirmus*. We investigated the physiological role of NhaCs in  
316 highly resistant pathogen *S. aureus* that successfully survives in alkaliphilic conditions in  
317 the environment as well as human host. All three *S. aureus* NhaCs are structurally  
318 distinct and shows structural identity <27% on alignment tool. Interestingly, NhaC3  
319 showed robust activity among three NhaCs and also exhibited significantly distinct  
320 synergistic relationship with Mnh1 in halotolerance. Since Mnh1 regulates sodium  
321 toxicity and pH homeostasis at pH 7.5 and NhaCs are active at high alkaline pH 9.5, it  
322 was interesting to observe the effect of both types of antiporters on overall pH regulation  
323 of *S. aureus* under wide range of osmotic and pH stresses. We constructed double  
324 knockouts of *nhaC1*, *nhaC2*, and *nhaC3* with *mnh1* respectively. When these double  
325 knockouts were grown at pH range 7.5 to 9.5, severe consequence of alkaline stress  
326 was observed at pH 9.5. Supplementing growth medium with 1 M NaCl made  
327  $\Delta nhaC1\Delta mnh1$  and  $\Delta nhaC3\Delta mnh1$  double knockouts highly sensitive even at pH 7.5  
328 that further exacerbated with increasing pH. Altogether, these findings confirm the cross  
329 talk between NhaC1, NhaC3, and Mnh1 in regulating pH and maintaining cell  
330 homeostasis.

331 Similarly, the results confirm that both of CPA1 candidates actively exchange  $\text{Na}^+/\text{H}^+$   
332 and  $\text{K}^+/\text{H}^+$  between pH ranges 7 to 9.5 (Fig 2). CPA1-1 catalyzes  $\text{Na}^+/\text{K}^+$  and  $\text{H}^+$

333 exchange near neutral pH 7-8. While CPA1-2 is active within a wide range of pH and  
334 actively maintains homeostasis at alkaline conditions. CPA1-2 exhibited maximum  
335 dequenching which reaches upto ~93% among whole cohort of CPA in *S. aureus*  
336 indicating its active involvement in pH homeostasis in alkaline environment. However,  
337  $\Delta cpa1-2$  did not show any significant decrease in growth pattern under sodium toxicity  
338 (Fig 4) possibly due to compensatory activation of other antiporters at low (Mnh1) as  
339 well as high pH (NhaCs and Mnh2) (Fig 7). In  $\Delta cpa1-2\Delta mnh1$ , growth deficit was  
340 significantly higher under stress conditions than single knockouts of both genes, which  
341 clearly indicates the synergistic functional overlapping of *cpa1-2* with *mnh1*.

342 It has been reported previously that in many other bacterial and archaeal phyla, CPA2  
343 may function as cation/proton efflux system (29). Some of the other CPA2 family  
344 transporters have been hypothesized to be channel (30). In *E. coli* and bacillus species  
345 CPA2 function is regulated by c-AMP (31). However, functional loss of CPA2 did not  
346 affect the viability of *S. aureus* under any pH and salt generated stress conditions (Fig  
347 4A). The data were consistent exhibiting no catalytic activity for  $K^+/H^+$  and  $Na^+/H^+$   
348 exchange at any pH ranges between pH 7.0 to 9.5 (data not shown). The results  
349 strongly suggest that in *S. aureus*, CPA2 does not likely function as cation/proton efflux  
350 antiporters but have possibility to function as other transporters or ion channel.

351 Overall, in *S. aureus* most of the antiporters (CPA1-2, Mnh2, NhaC1, NhaC2 and  
352 NhaC3) were regulating pH homeostasis effectively at alkaline pH range. These  
353 antiporters were extruding sodium and potassium in exchange of protons to maintain  
354 cytoplasmic pH during alkaline stress and sodium toxicity. *S. aureus* is neutrophile  
355 and it can successfully survive and grow at higher pH range due to these groups of



356 cation/proton efflux pump that potentially regulates osmotolerance and halotolerance at  
357 alkaline pH range (Fig 7). At near neutral pH, Mnh1 was found to synergize with CPA1-  
358 1 in order to regulate the sodium toxicity and pH homeostasis while at higher pH range,  
359 it was found to functionally synergize with CPA1-2, NhaC1 and NhaC3 that are  
360 functionally active at alkaline pH range. The CPA1, CPA3 and NhaC family antiporters  
361 have enough functional overlap and each antiporter play critical compensatory role in  
362 viability when one has lost function. Inactivation of NhaC3 by clean deletion in Newman  
363 significantly reduces the virulence of *S. aureus* in murine infection model. None of other  
364 antiporters in NhaC and CPA1 family resulted in marked reduction of virulence. The  
365 lethal effect of *nhaC3* was restored by complementing gene in knockout strain. This  
366 finding establishes NhaC3 as potential therapeutic targets and provides strong rationale  
367 for inhibitor screening against NhaC3 for therapeutic development.

### 368 **Acknowledgement**

369 This work was supported by research grant R01GM028454 from the National Institute of  
370 General Medical Sciences to T.A.K. A.A. was intern and actively volunteered to this  
371 project. Amit Kumar, a junior faculty member at Burke Neurological Institute, contributed  
372 in critical proofreading and editing of the manuscript.

### 373 **References:**

- 374 1. Ukpanah M, U. Upla P. 2017. Why is *Staphylococcus aureus* Such a Successful  
375 Pathogen?, vol 19.
- 376 2. Padan E, Bibi E, Ito M, Krulwich TA. 2005. Alkaline pH homeostasis in bacteria:  
377 new insights. *Biochim Biophys Acta* 1717:67-88.

- 378 3. Ivey DM, Guffanti AA, Bossewitch JS, Padan E, Krulwich TA. 1991. Molecular  
379 cloning and sequencing of a gene from alkaliphilic *Bacillus firmus* OF4 that  
380 functionally complements an *Escherichia coli* strain carrying a deletion in the  
381 *nhaA* Na<sup>+</sup>/H<sup>+</sup> antiporter gene. *J Biol Chem* 266:23483-9.
- 382 4. Wei Y, Guffanti AA, Ito M, Krulwich TA. 2000. *Bacillus subtilis* Yqkl is a novel  
383 malic/Na<sup>+</sup>-lactate antiporter that enhances growth on malate at low protonmotive  
384 force. *J Biol Chem* 275:30287-92.
- 385 5. Stoy N, Mackay GM, Forrest CM, Christofides J, Egerton M, Stone TW,  
386 Darlington LG. 2005. Tryptophan metabolism and oxidative stress in patients with  
387 Huntington's disease. *J Neurochem* 93:611-23.
- 388 6. Gerday C, Glansdorff N. 2007. Physiology and Biochemistry of Extremophiles  
389 Preface. *Physiology and Biochemistry of Extremophiles*:Xv-Xvi.
- 390 7. Krulwich TA, Hicks DB, Ito M. 2009. Cation/proton antiporter complements of  
391 bacteria: why so large and diverse? *Mol Microbiol* 74:257-60.
- 392 8. Slonczewski JL, Fujisawa M, Dopson M, Krulwich TA. 2009. Cytoplasmic pH  
393 measurement and homeostasis in bacteria and archaea. *Adv Microb Physiol*  
394 55:1-79, 317.
- 395 9. Rozen Y, Belkin S. 2001. Survival of enteric bacteria in seawater. *FEMS*  
396 *Microbiol Rev* 25:513-29.
- 397 10. Ito M, Guffanti AA, Zemsky J, Ivey DM, Krulwich TA. 1997. Role of the *nhaC*-  
398 encoded Na<sup>+</sup>/H<sup>+</sup> antiporter of alkaliphilic *Bacillus firmus* OF4. *J Bacteriol*  
399 179:3851-7.

- 400 11. Ito M, Cooperberg B, Krulwich TA. 1997. Diverse genes of alkaliphilic *Bacillus*  
401 *firmus* OF4 that complement K<sup>+</sup>-uptake-deficient *Escherichia coli* include an ftsH  
402 homologue. *Extremophiles* 1:22-8.
- 403 12. Micenkova L, Bosak J, Vrba M, Sevcikova A, Smajs D. 2016. Human  
404 extraintestinal pathogenic *Escherichia coli* strains differ in prevalence of virulence  
405 factors, phylogroups, and bacteriocin determinants. *BMC Microbiol* 16:218.
- 406 13. Picard B, Garcia JS, Gouriou S, Duriez P, Brahim N, Bingen E, Elion J, Denamur  
407 E. 1999. The link between phylogeny and virulence in *Escherichia coli*  
408 extraintestinal infection. *Infect Immun* 67:546-53.
- 409 14. Minato Y, Ghosh A, Faulkner WJ, Lind EJ, Schesser Bartra S, Plano GV, Jarrett  
410 CO, Hinnebusch BJ, Winogrodzki J, Dibrov P, Hase CC. 2013. Na<sup>+</sup>/H<sup>+</sup> antiport is  
411 essential for *Yersinia pestis* virulence. *Infect Immun* 81:3163-72.
- 412 15. Vimont S, Berche P. 2000. NhaA, an Na<sup>+</sup>/H<sup>+</sup> antiporter involved in environmental  
413 survival of *Vibrio cholerae*. *J Bacteriol* 182:2937-44.
- 414 16. Resch CT, Winogrodzki JL, Patterson CT, Lind EJ, Quinn MJ, Dibrov P, Hase  
415 CC. 2010. The putative Na<sup>+</sup>/H<sup>+</sup> antiporter of *Vibrio cholerae*, Vc-NhaP2, mediates  
416 the specific K<sup>+</sup>/H<sup>+</sup> exchange in vivo. *Biochemistry* 49:2520-8.
- 417 17. Quinn MJ, Resch CT, Sun J, Lind EJ, Dibrov P, Hase CC. 2012. NhaP1 is a  
418 K<sup>+</sup>(Na<sup>+</sup>)/H<sup>+</sup> antiporter required for growth and internal pH homeostasis of *Vibrio*  
419 *cholerae* at low extracellular pH. *Microbiology* 158:1094-105.
- 420 18. Vaish M, Price-Whelan A, Reyes-Robles T, Liu J, Jereen A, Christie S, Alonzo F,  
421 3rd, Benson MA, Torres VJ, Krulwich TA. 2018. Roles of *Staphylococcus aureus*

- 422 Mnh1 and Mnh2 Antiporters in Salt Tolerance, Alkali Tolerance, and  
423 Pathogenesis. *J Bacteriol* 200.
- 424 19. Simonet JM, Boccard F, Pernodet JL, Gagnat J, Guerineau M. 1987. Excision  
425 and integration of a self-transmissible replicon of *Streptomyces ambofaciens*.  
426 *Gene* 59:137-44.
- 427 20. Memmi G, Filipe SR, Pinho MG, Fu Z, Cheung A. 2008. *Staphylococcus aureus*  
428 PBP4 is essential for beta-lactam resistance in community-acquired methicillin-  
429 resistant strains. *Antimicrob Agents Chemother* 52:3955-66.
- 430 21. Horton RM. 1993. In Vitro Recombination and Mutagenesis of DNA : SOEing  
431 Together Tailor-Made Genes. *Methods Mol Biol* 15:251-61.
- 432 22. Liu J, Ryabichko S, Bogdanov M, Fackelmayer OJ, Dowhan W, Krulwich TA.  
433 2014. Cardiolipin is dispensable for oxidative phosphorylation and non-  
434 fermentative growth of alkaliphilic *Bacillus pseudofirmus* OF4. *J Biol Chem*  
435 289:2960-71.
- 436 23. Guzman LM, Belin D, Carson MJ, Beckwith J. 1995. Tight regulation, modulation,  
437 and high-level expression by vectors containing the arabinose PBAD promoter. *J*  
438 *Bacteriol* 177:4121-30.
- 439 24. Morino M, Natsui S, Swartz TH, Krulwich TA, Ito M. 2008. Single gene deletions  
440 of mrpA to mrpG and mrpE point mutations affect activity of the Mrp Na<sup>+</sup>/H<sup>+</sup>  
441 antiporter of alkaliphilic *Bacillus* and formation of hetero-oligomeric Mrp  
442 complexes. *J Bacteriol* 190:4162-72.
- 443 25. Passalacqua KD, Satola SW, Crispell EK, Read TD. 2012. A mutation in the  
444 PP2C phosphatase gene in a *Staphylococcus aureus* USA300 clinical isolate

- 445 with reduced susceptibility to vancomycin and daptomycin. *Antimicrob Agents*  
446 *Chemother* 56:5212-23.
- 447 26. Lau SK, Fan RY, Ho TC, Wong GK, Tsang AK, Teng JL, Chen W, Watt RM,  
448 Curreem SO, Tse H, Yuen KY, Woo PC. 2011. Environmental adaptability and  
449 stress tolerance of *Laribacter hongkongensis*: a genome-wide analysis. *Cell*  
450 *Biosci* 1:22.
- 451 27. Tettelin H, Saunders NJ, Heidelberg J, Jeffries AC, Nelson KE, Eisen JA,  
452 Ketchum KA, Hood DW, Peden JF, Dodson RJ, Nelson WC, Gwinn ML, DeBoy  
453 R, Peterson JD, Hickey EK, Haft DH, Salzberg SL, White O, Fleischmann RD,  
454 Dougherty BA, Mason T, Ciecko A, Parksey DS, Blair E, Cittone H, Clark EB,  
455 Cotton MD, Utterback TR, Khouri H, Qin H, Vamathevan J, Gill J, Scarlato V,  
456 Massignani V, Pizza M, Grandi G, Sun L, Smith HO, Fraser CM, Moxon ER,  
457 Rappuoli R, Venter JC. 2000. Complete genome sequence of *Neisseria*  
458 *meningitidis* serogroup B strain MC58. *Science* 287:1809-15.
- 459 28. Fleischmann RD, Adams MD, White O, Clayton RA, Kirkness EF, Kerlavage AR,  
460 Bult CJ, Tomb JF, Dougherty BA, Merrick JM, et al. 1995. Whole-genome  
461 random sequencing and assembly of *Haemophilus influenzae* Rd. *Science*  
462 269:496-512.
- 463 29. Lorca GL, Barabote RD, Zlotopolski V, Tran C, Winnen B, Hvorup RN,  
464 Stonestrom AJ, Nguyen E, Huang LW, Kim DS, Saier MH, Jr. 2007. Transport  
465 capabilities of eleven gram-positive bacteria: comparative genomic analyses.  
466 *Biochim Biophys Acta* 1768:1342-66.

- 467 30. Booth IR, Jones MA, McLaggan D, Nikolaev Y, Ness LS, Wood CM, Miller S,  
468 Töttemeyer S, Ferguson GP. 1996. Chapter 30 Bacterial ion channels, p 693-729.  
469 *In* Konings WN, Kaback HR, Lolkema JS (ed), Handbook of Biological Physics,  
470 vol 2. North-Holland.
- 471 31. Corrigan RM, Campeotto I, Jeganathan T, Roelofs KG, Lee VT, Grundling A.  
472 2013. Systematic identification of conserved bacterial c-di-AMP receptor  
473 proteins. Proc Natl Acad Sci U S A 110:9084-9.
- 474 32. Duthie ES, Lorenz LL. 1952. *Staphylococcal* coagulase; mode of action and  
475 antigenicity. J Gen Microbiol 6:95-107.
- 476 33. Novick RP. 1991. Genetic systems in staphylococci. Methods Enzymol 204:587-  
477 636.
- 478 34. Nozaki K, Inaba K, Kuroda T, Tsuda M, Tsuchiya T. 1996. Cloning and  
479 sequencing of the gene for Na<sup>+</sup>/H<sup>+</sup> antiporter of *Vibrio parahaemolyticus*.  
480 Biochem Biophys Res Commun 222:774-9.
- 481 35. Chan WT, Verma CS, Lane DP, Gan SK. 2013. A comparison and optimization  
482 of methods and factors affecting the transformation of *Escherichia coli*. Biosci  
483 Rep 33.
- 484 36. Arnaud M, Chastanet A, Debarbouille M. 2004. New vector for efficient allelic  
485 replacement in naturally nontransformable, low-GC-content, gram-positive  
486 bacteria. Appl Environ Microbiol 70:6887-91.
- 487 37. Stanne TM, Hanson E, Olsson S, Høglund J, Jood K, Blomstrand C, Jern C.  
488 2013. Factor VII antigen levels are differentially associated to etiological  
489 subtypes of ischaemic stroke. Thromb Haemost 110:1305-6.

490

491

492

493 **Figure 1:** Antiporter activity of NhaC1, NhaC2 and NhaC3 were assayed at pH 9.5 for  
494  $\text{Na}^+/\text{H}^+$  and  $\text{K}^+/\text{H}^+$  exchange. Empty pBAD vector in first lane was taken as control for  
495 measuring  $\text{Na}^+/\text{H}^+$  and  $\text{K}^+/\text{H}^+$  exchange. The everted membrane vesicles were prepared  
496 using *E. coli* KNabc host transformed with inducible pBAD vector in which *S. aureus*  
497 *nhaC* genes were cloned. Addition of 2.5 mM succinate in assay buffer generated PMF  
498 which was monitored as fluorescence quenching using 1 M acridine orange as  $\Delta\text{pH}$   
499 probe. The antiport activity was measured as percentage dequenching in fluorescence  
500 after adding 10 mM of NaCl or KCl. 1 mM  $\text{NH}_4\text{Cl}$  was used to terminate the reaction  
501 which establish a baseline. The tracing is representative of antiport assay carried out  
502 with three independent vesicle preparations and conducted in duplicate for each  
503 preparation. A. U. is arbitrary units.

504 **Figure 2:** Antiporter activity of CPA1-1(A and B) and CPA1-2 (C and D) were performed  
505 as function of pH for  $\text{Na}^+/\text{H}^+$  and  $\text{K}^+/\text{H}^+$  exchange. Lane (E) is representative of control  
506 assay performed using  $\text{Na}^+$  and  $\text{K}^+$  salt resulting in no dequenching with change in pH.  
507 *S. aureus* Newman *cpa1-1* and *cpa1-2* genes were overexpressed into inducible pBAD  
508 vector and transformed into *E. coli* KNabc host. These strains were used for large scale  
509 culture and preparing membrane vesicles for the assay. Addition of 2.5 mM succinate in  
510 assay buffer generated PMF which was monitored as fluorescence quenching using 1 M  
511 acridine orange as  $\Delta\text{pH}$  probe. The antiport activity was measured as percentage

512 dequenching in fluorescence after adding 10 mM of NaCl or KCl. 1 mM NH<sub>4</sub>Cl was used  
513 to terminate the reaction, which establish a baseline. The tracing is representative of  
514 antiport assay carried out with three independent vesicle preparations and conducted in  
515 duplicate for each preparation. A. U. is arbitrary units.

516 **Figure 3:** (A) Physiological role of NhaC1, NhaC2 and NhaC3 were assessed on single,  
517 double and triple deletions of *nhaC* genes in Newman at pH 7.5, 8.5 and 9.5 using 1 M  
518 NaCl and 1 M KCl. In lane B, double knockouts strains of *mnh1* with *nhaC1* and *nhaC3*  
519 respectively were used under same the condition. For growth experiments shown in all  
520 panels, strains were grown in pH 7.5 LB0 at 37°C. 1 M NaCl and 1 M KCl were added  
521 as indicated. Lane C represents complementation of wild type Newman *nhaC1* and  
522 *nhaC3* genes into  $\Delta nhaC1\Delta mnhA1$  and  $\Delta nhaC3\Delta mnhA1$  knockout strains using pOS1  
523 vector and using pOS1::empty in respective double knockouts as a control. The growth  
524 curve assay was conducted in three independent sets of experiments. Error bars  
525 represent the standard deviation.

526 **Figure 4:** (A) Physiological role of CPA1-1, CPA1-2 and CPA2 were assessed with  
527 single, and double deletions of *cpa1-1*, *cpa1-2* and *cpa2* genes in Newman at pH 7.5,  
528 8.5 and 9.5 using 1 M NaCl and 1 M KCl. In lane B, double knockouts strains of *mnh1*  
529 with *cpa1-1* and *cpa1-2* respectively, were used under same the condition. For growth  
530 experiments shown in all panels, strains were grown in pH 7.5 LB0 at 37°C. 1 M NaCl  
531 and 1 M KCl were added as indicated. (C) For complementation experiments, wild type  
532 Newman *cpa1-1* and *cpa1-2* were complemented in respective double deletion strains  
533 of  $\Delta cpa1-1\Delta mnhA1$  and  $\Delta cpa1-2\Delta mnhA1$  using pOS1 vector. Double knockouts



534 transformed with pOS1::empty were taken as control strains. The growth curve assay  
535 was conducted in three independent sets of experiments. Error bars represent the  
536 standard deviation.

537 **Figure 5:** Expression of *cpa1-1*, *cpa1-2*, *cpa2*, *mnhA1*, *mnhA2*, *nhaC1*, *nhaC2*, and  
538 *nhaC3* genes in *S. aureus* Newman were assessed at pH 6.0 and pH 9.5 without any  
539 added salt. *Pyk*, *fabD* and *QoxB* were used as reference genes. Data represent  
540 average of biological triplicates and error bars show represent standard deviation.

541 **Figure 6:** *In-vivo* assay for *S. aureus* pathogenesis. **(A)** Survival curve of mice n=10 in  
542 each group was infected intravenously using  $\sim 1 \times 10^7$  CFU of Newman wild type,  $\Delta cpa1-$   
543  $1$ ,  $\Delta cpa1-2$ ,  $\Delta nhaC1$ ,  $\Delta nhaC2$  and  $\Delta nhaC3$ . **(B)** Survival curve of mice infected  
544 intravenously with  $\Delta nhaC3/pOS1::empty$  (n=10) and  $\Delta nhaC3/pOS1::nhaC3$  (n=10). **(C)**  
545 CFU count from kidney tissues harvested from mice infected with Newman wild type  
546 and  $\Delta nhaC3$  after  $\sim 96$  hours of post infection. The error bar represents standard  
547 deviation.

548 **Figure 7:** Model depicting whole cohort of secondary cation/proton antiporters in *S.*  
549 *aureus* located at different loci in cytoplasmic membrane. This figure represents two  
550 CPA1; CPA1-1 and CPA1-2, two CPA3; Mnh1 and Mnh2 and three NhaCs; NhaC1,  
551 NhaC2 and NhaC3 functioning as key players in proton retention in changing  
552 environment between pH 6.8 to 9.5 by effluxing  $Na^+$  and/or  $K^+$  out in exchange of  $H^+$ . As  
553 shown in the figure, Mnh1, CPA1-1 and CPA1-2 actively involved in  $Na^+$  and/or  $K^+$  efflux  
554 near neutral to pH 7.5. Mnh2, NhaC1, NhaC2, NhaC3 and CPA1-2 exhibited catalytic  
555 activity pH > 7.5 to highly alkaline pH.

556 **Table 1: NhaC1, NhaC2 and NhaC3 antiporter activities at pH 9.5<sup>a</sup>**

557 <sup>a</sup>Antiporter assay was conducted using 2.5 mM tris-succinate to generate proton motive  
558 force feeding proton inside the everted vesicles. The everted membrane vesicles were  
559 prepared using *E. coli* KNabc host transformed with inducible pBad vector in which *S.*  
560 *aureus nhaC1, nhaC2* and *nhaC3* were cloned along with empty vector as control.  
561 Assays were conducted between pH values 7.0 to 9.5 (data not shown). NhaC  
562 candidates were active at pH 9.5 exhibiting maximum dequenching.

563 <sup>b</sup> $K_m$  values ( $\pm$  standard deviation) were calculated as average of three independent sets  
564 of experiments that were conducted in duplicate with freshly prepared membrane  
565 vesicles from pre-grown culture.

566 **Table 2: CPA1-1 and cPA1-2 activity profile at optimal pH<sup>a</sup>**

567 <sup>a</sup>Antiporter assays were performed in everted membrane vesicles using *E. coli* cells  
568 which were transformed with inducible pBAD vector with cloned *S. aureus cpa1-1* and  
569 *cpa1-2* genes and taking empty vector controls. 2.5 mM tris-succinate was used in  
570 assay buffer to energize respiratory chain generating PMF.

571 <sup>b</sup>Assay were conducted on pH range 7.0 to 9.5 using NaCl and KCl. Assay pH on which  
572 CPA1-1 and CPA1-2 exhibited maximum dequenching was considered as optimal.

573 <sup>c</sup> $K_m$  values ( $\pm$  standard deviation) were calculated as average of three independent set  
574 of experiments that were conducted in duplicate with freshly prepared membrane  
575 vesicles from pre-grown culture.

576 **Table 3 and 4: Bacterial strains, plasmids and primers used in this study**



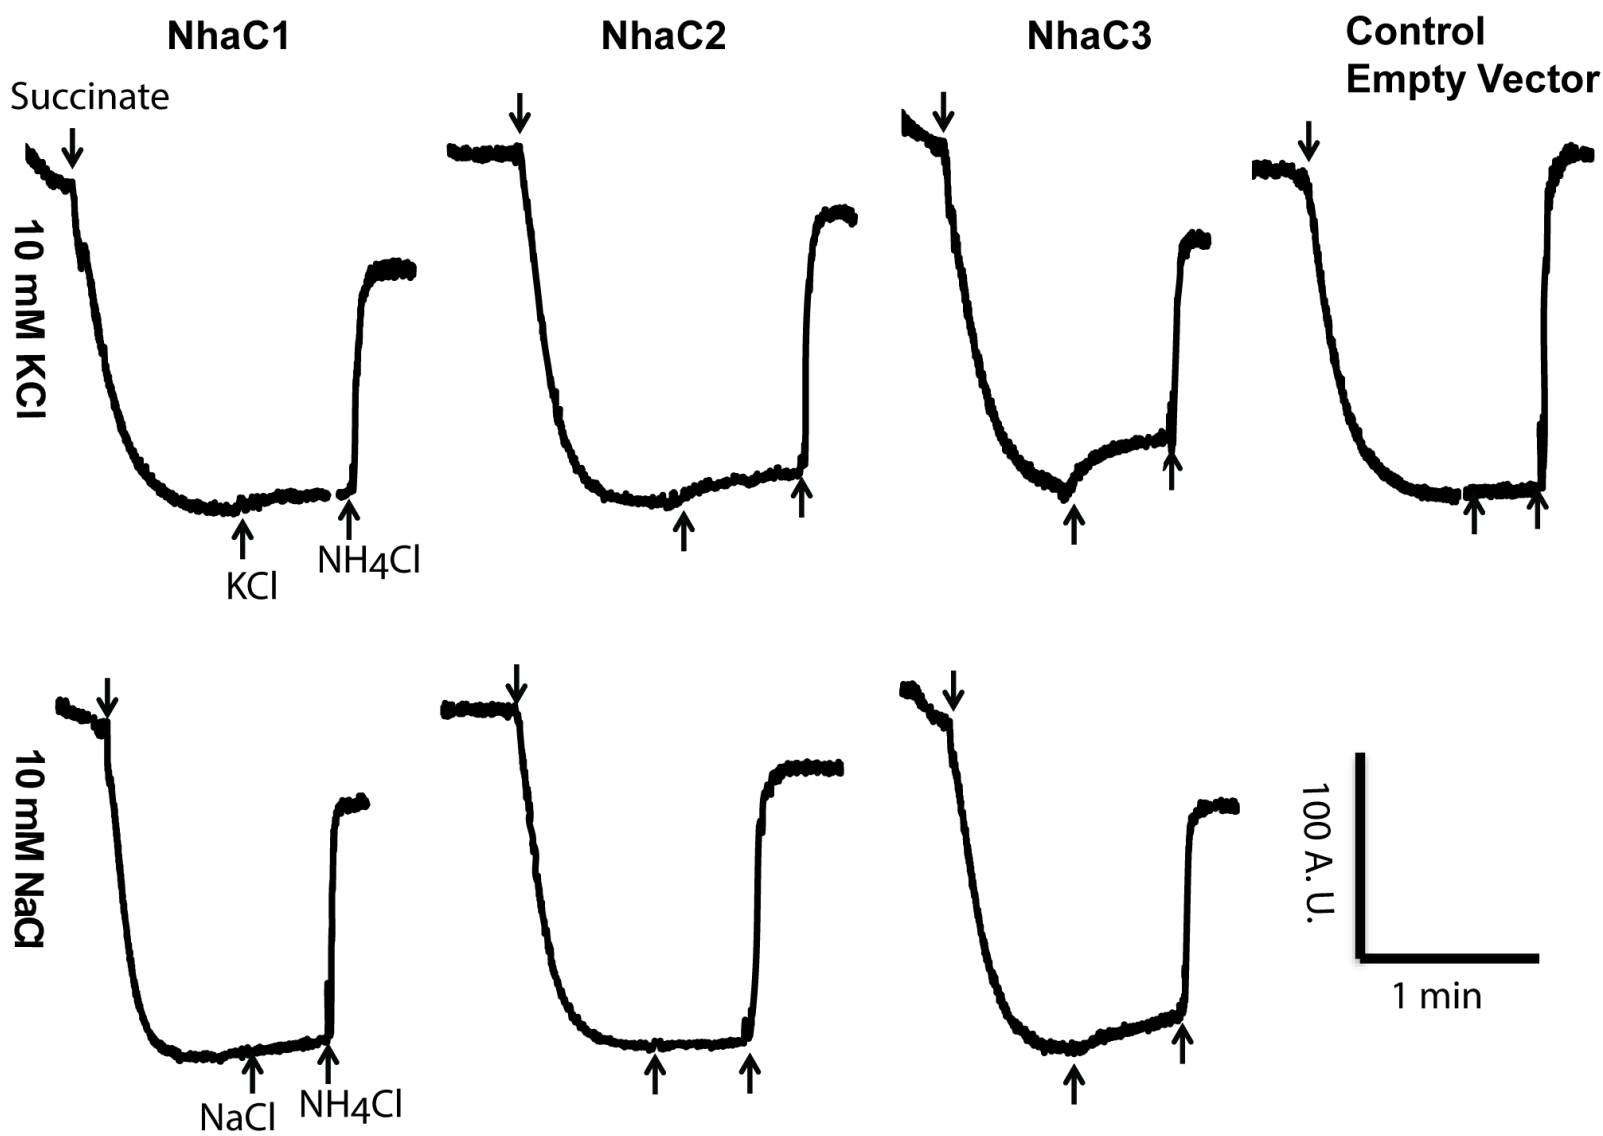

pH 7.0

pH 7.5

pH 8.5

pH 9.0

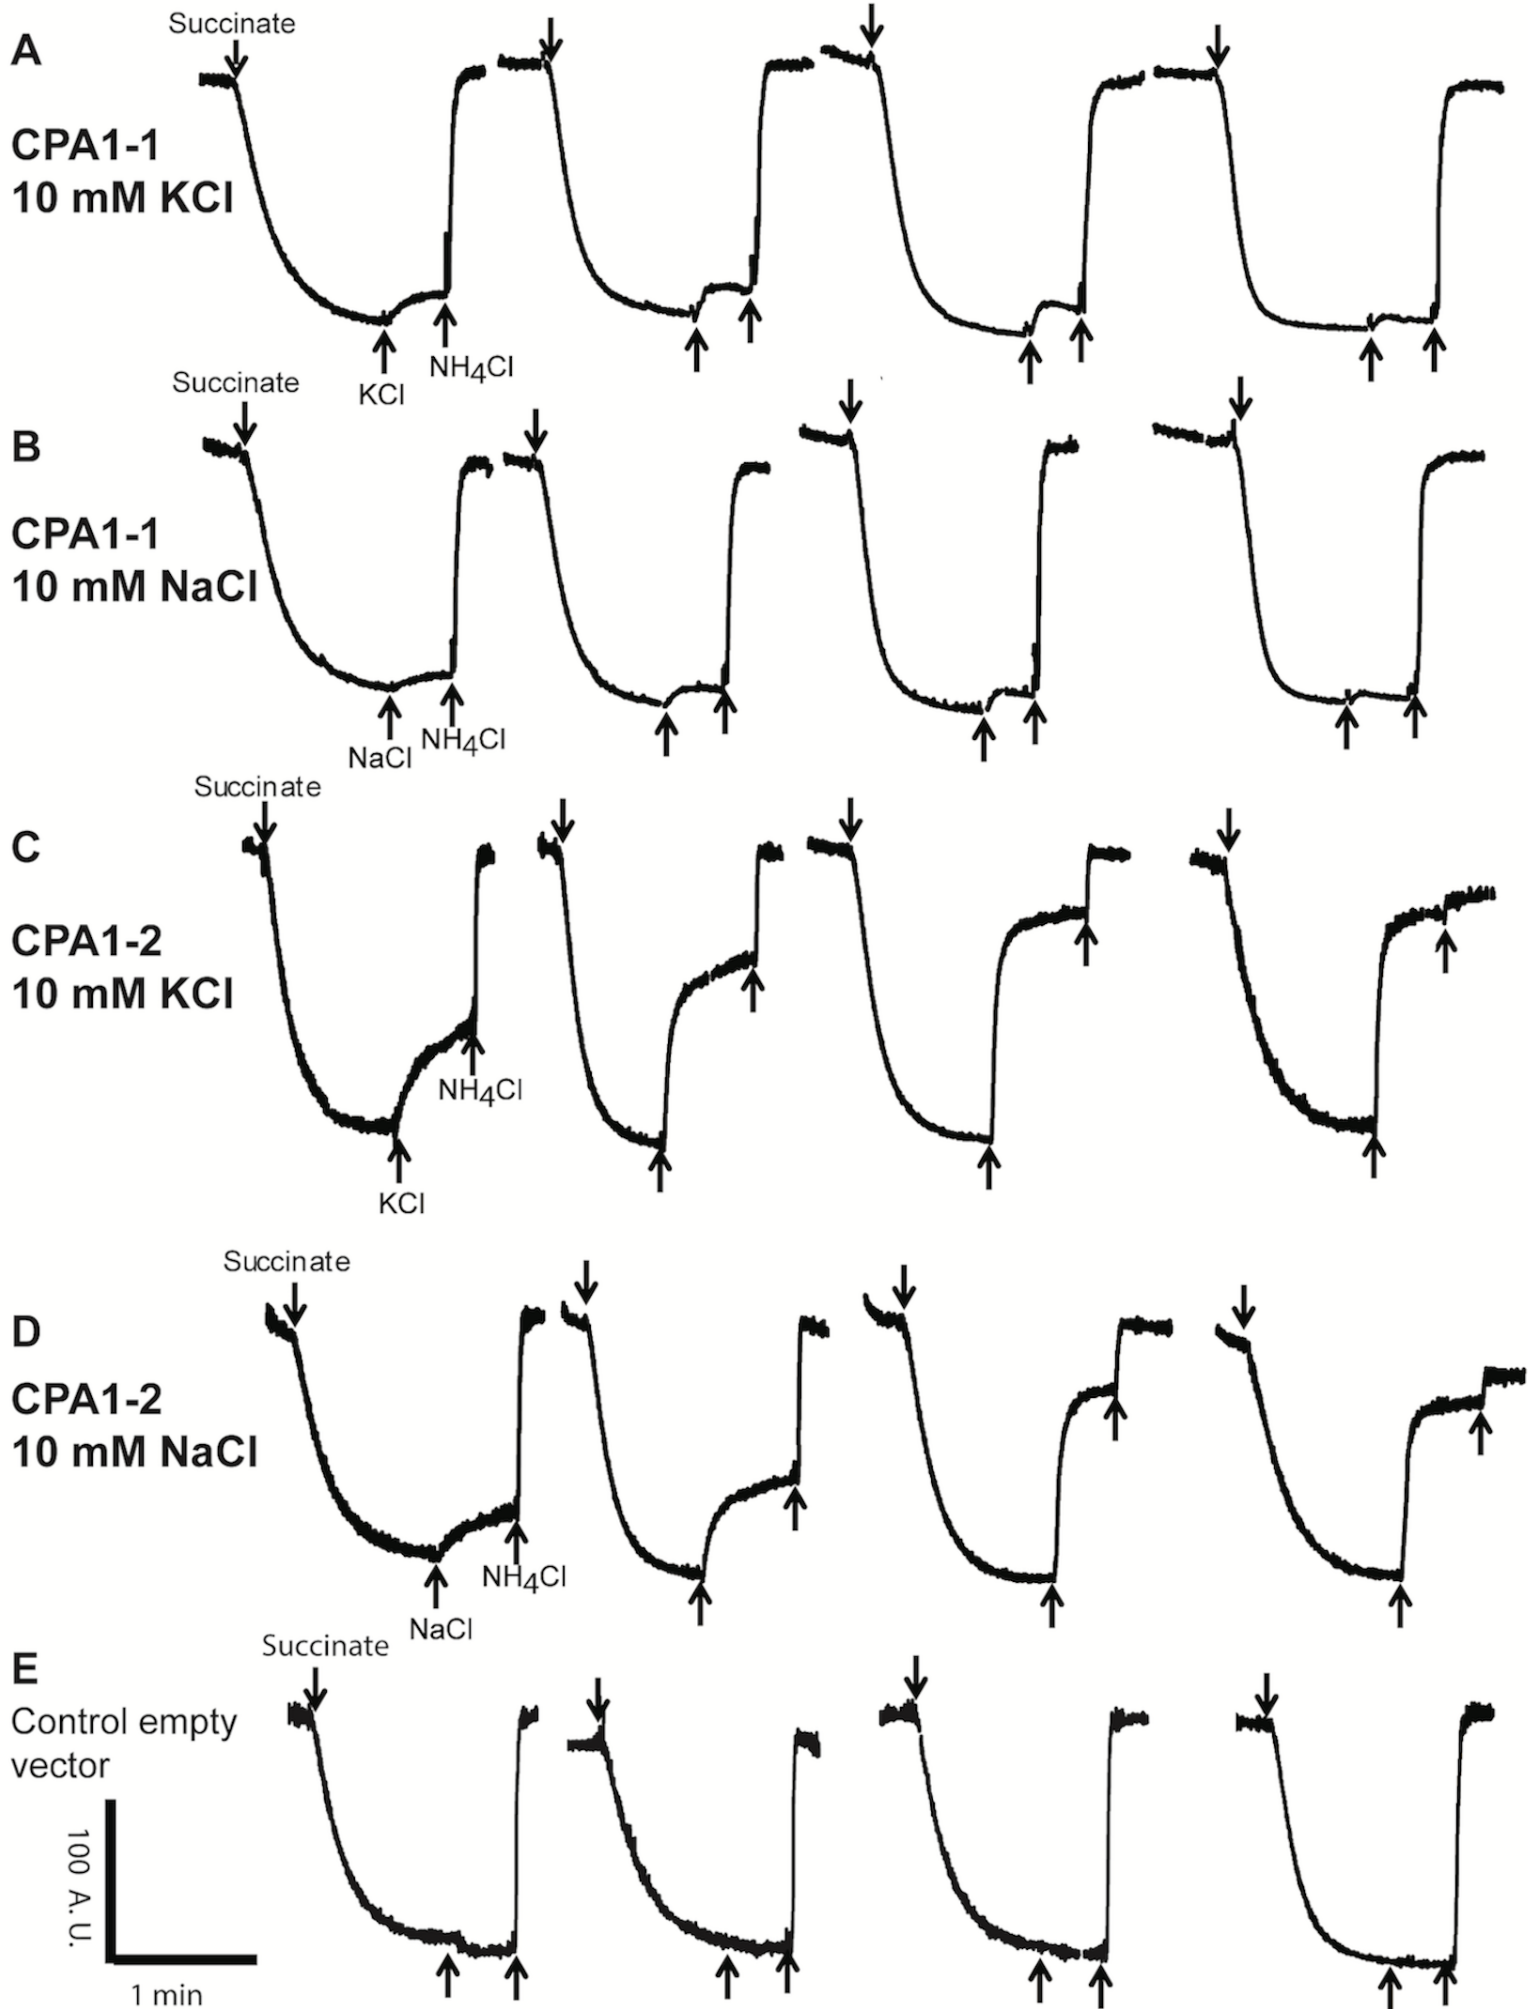

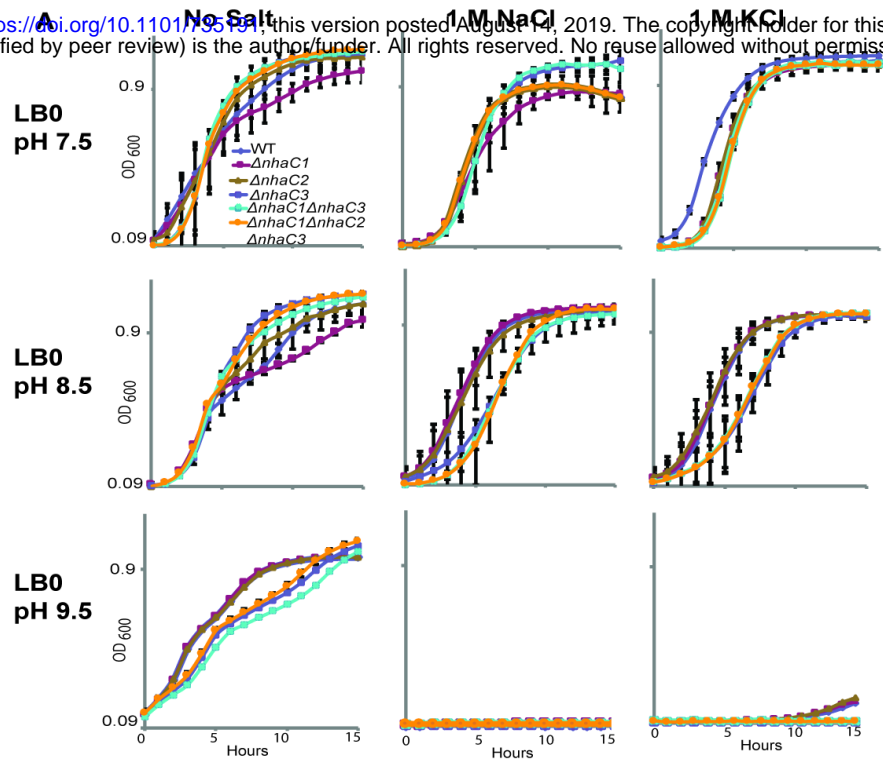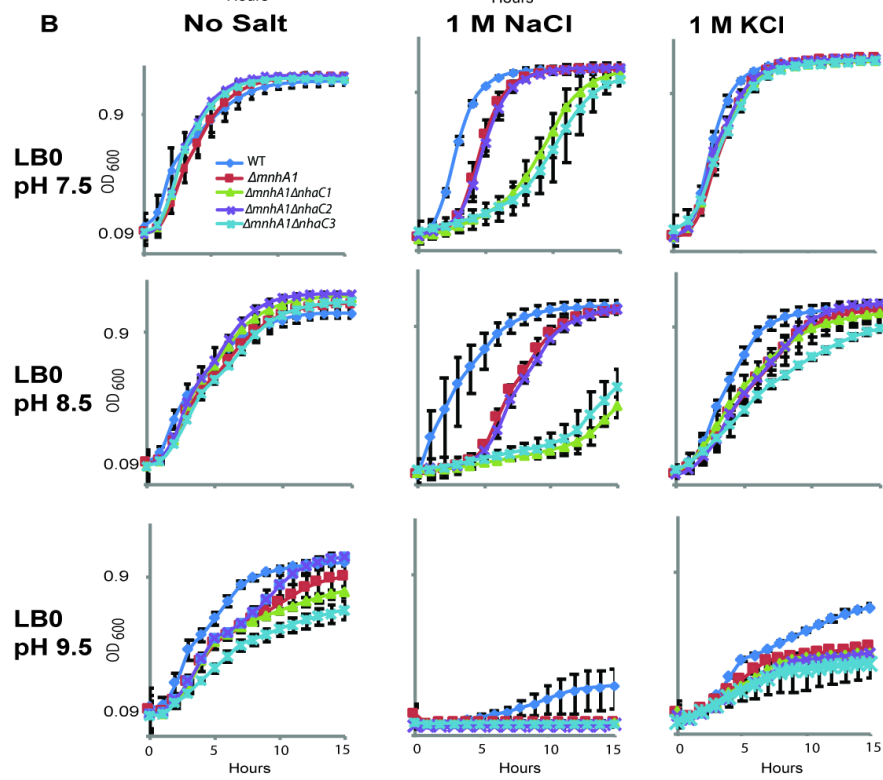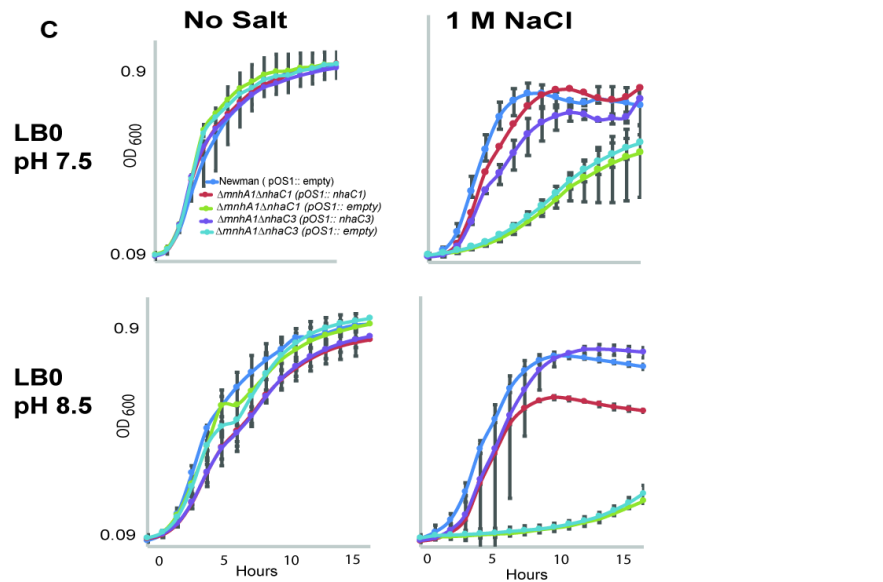

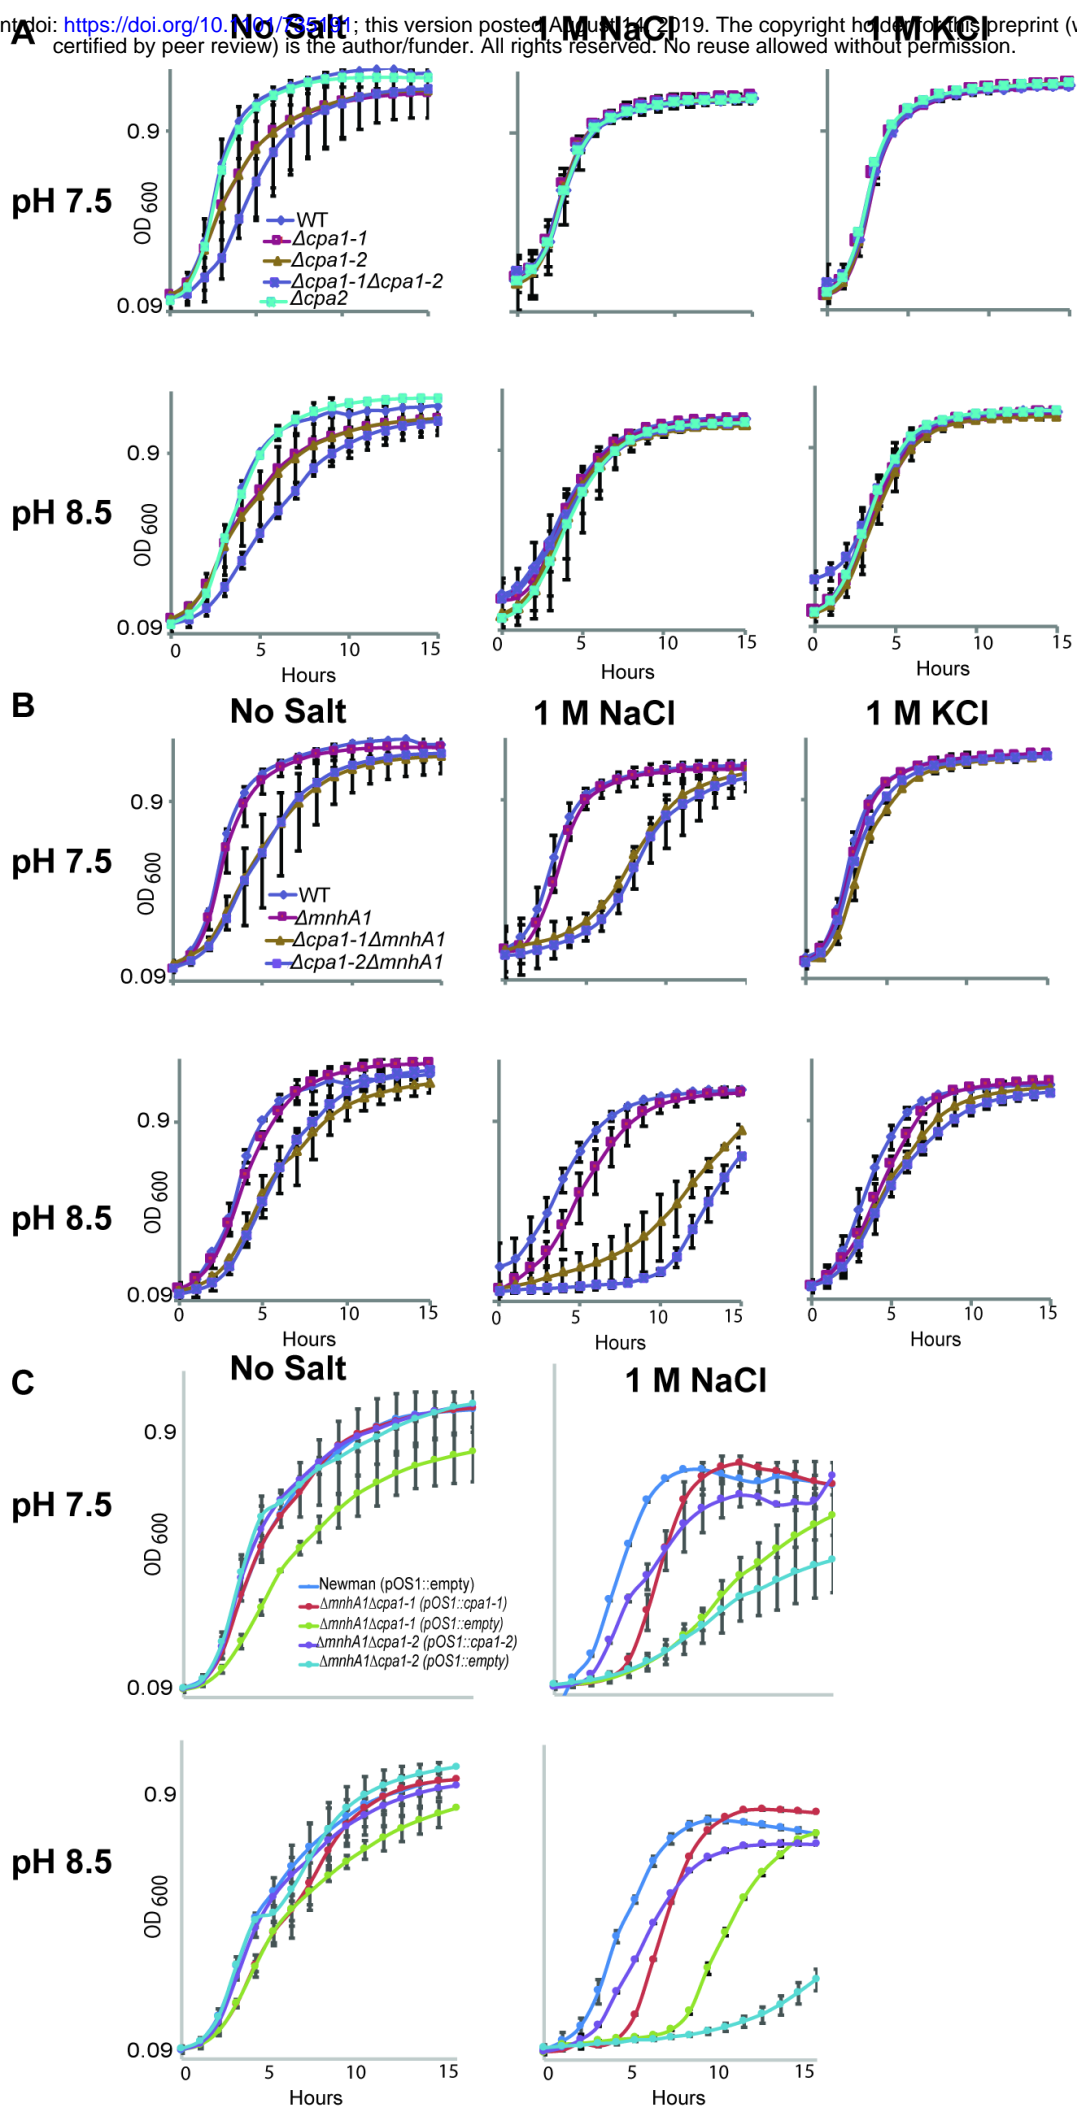

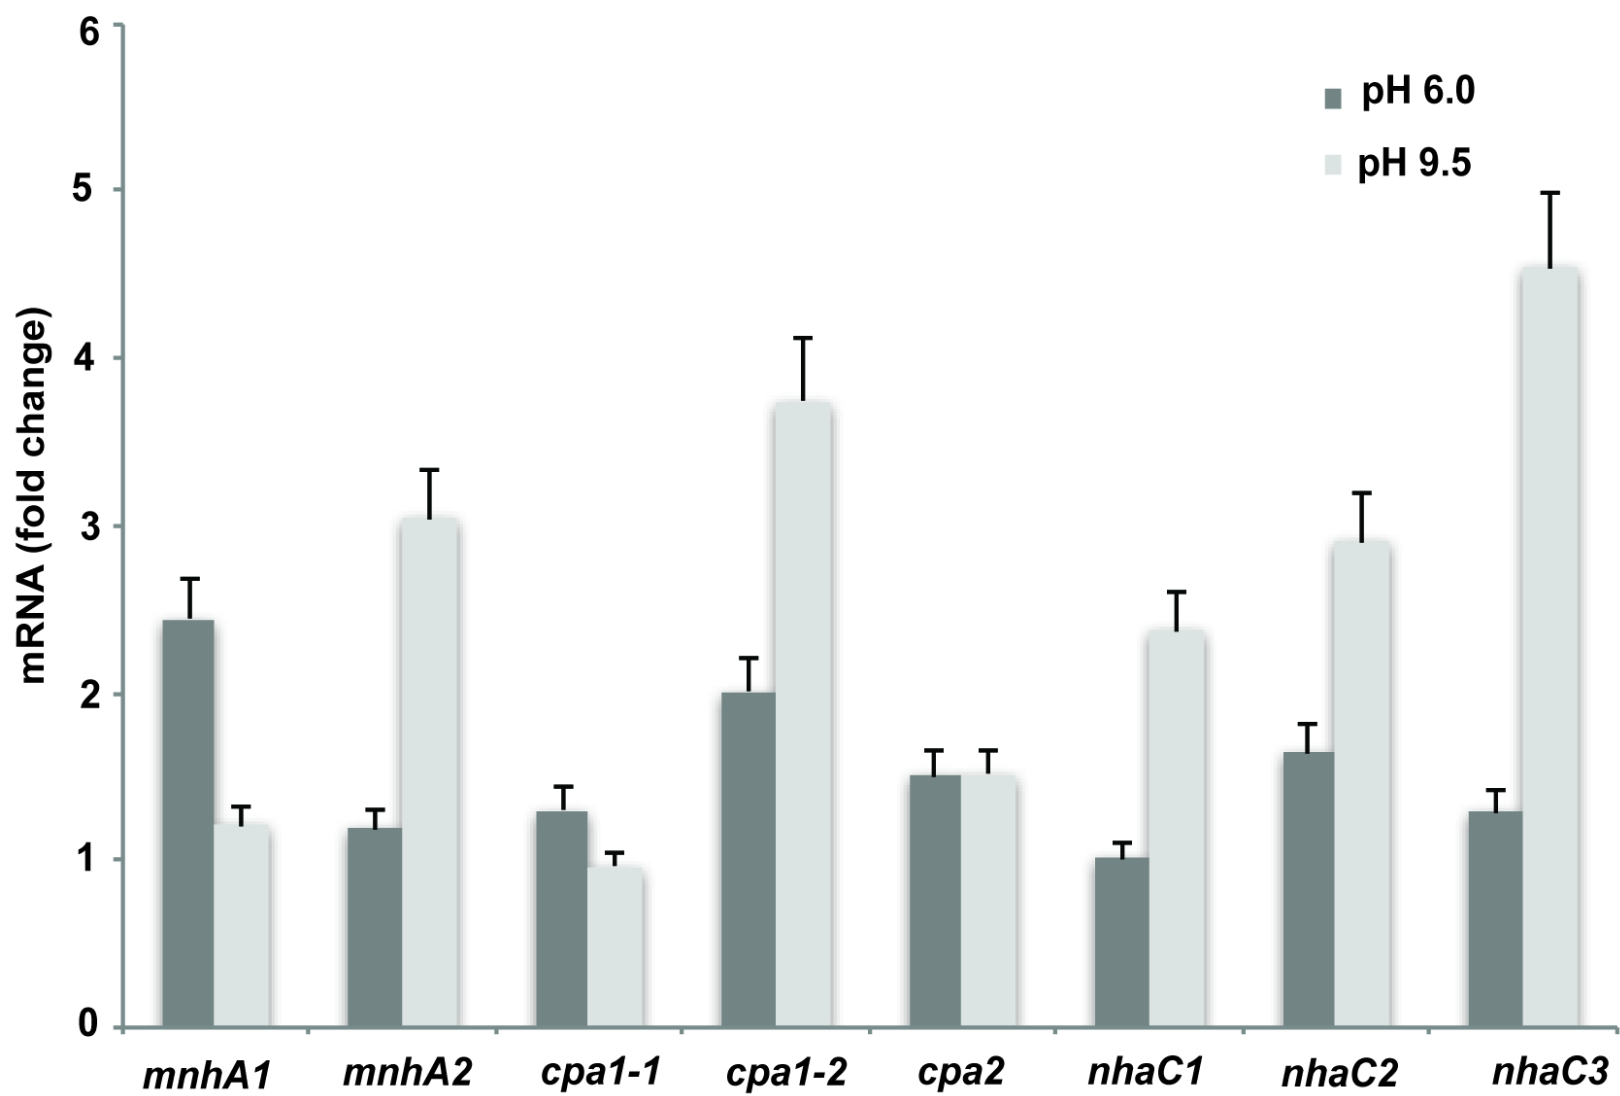



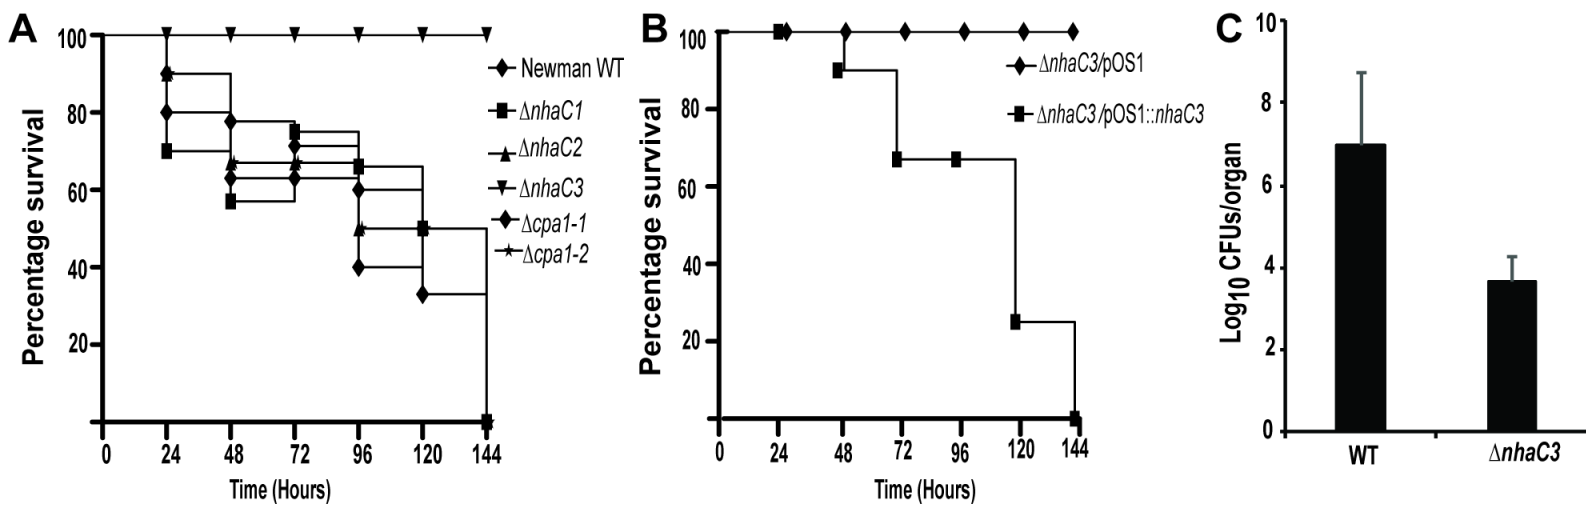

pH 7.0

pH 7.5

pH > 9.0

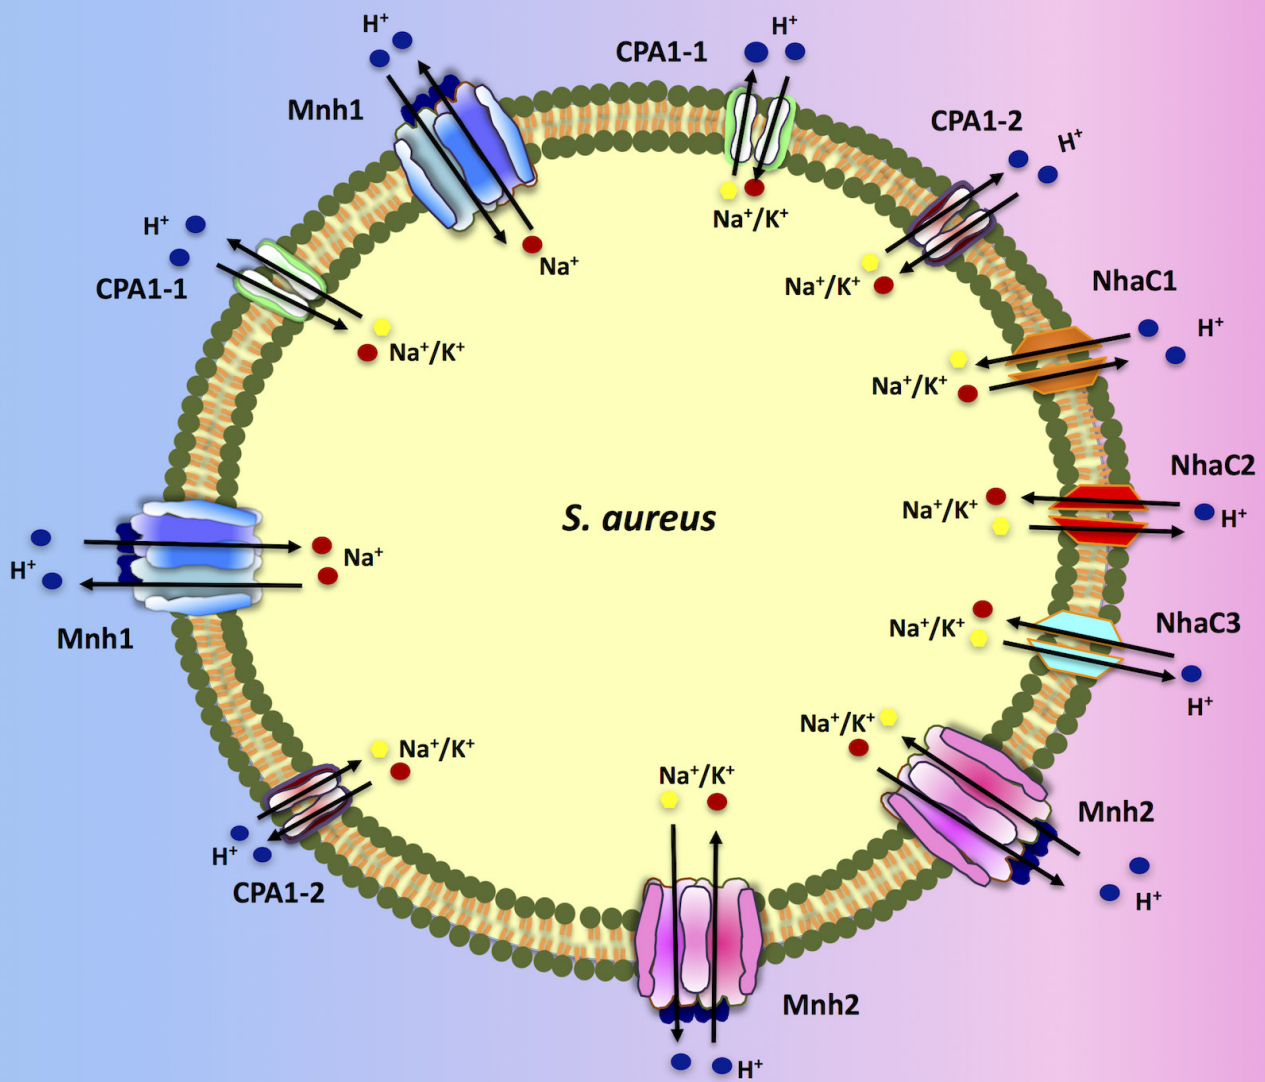

**Table 1:** NhaC1, NhaC2 and NhaC3 antiporter activities at pH 9.5<sup>a</sup>

| Antiporter | Substrate (10 mM) | Maximum activity at pH 9.5 (% Dequench) | $K_m$ value <sup>b</sup> (mM) |
|------------|-------------------|-----------------------------------------|-------------------------------|
| NhaC1      | K <sup>+</sup>    | 13                                      | 0.42±0.16                     |
|            | Na <sup>+</sup>   | 10                                      | -                             |
| NhaC2      | K <sup>+</sup>    | 10                                      | 0.75±0.04                     |
|            | Na <sup>+</sup>   | 5                                       | -                             |
| NhaC3      | K <sup>+</sup>    | 36                                      | 0.45±0.03                     |
|            | Na <sup>+</sup>   | 30                                      | 0.42±0.02                     |

<sup>a</sup>Antiporter assay was conducted using 2.5 mM tris-succinate to generate proton motive force feeding proton inside the everted vesicles. The everted membrane vesicles were prepared using *E. coli* KNabc host transformed with inducible pBad vector in which *S. aureus nhaC1*, *nhaC2* and *nhaC3* were cloned along with empty vector as control. Assays were conducted between pH values 7.0 to 9.5 (data not shown). NhaC candidates were active at pH 9.5 exhibiting maximum dequenching.

<sup>b</sup> $K_m$  values ( $\pm$  standard deviation) were calculated as average of three independent set of experiment that was conducted in duplicate with freshly prepared membrane vesicles from pregrown culture.

**Table 2:** CPA1-1 and CPA1-2 activity profile at optimal pH<sup>a</sup>.

| Antiporter | Substrate (10 mM) | Optimal assay <sup>b</sup> pH | Maximum activity at assay pH (%dequench) | $K_m$ Values <sup>c</sup> (mM) |
|------------|-------------------|-------------------------------|------------------------------------------|--------------------------------|
| CPA1-1     | K+                | 7.5                           | 16                                       | 14.81±11.16                    |
|            | Na+               | 7.5                           | 10                                       | 3.59±0.36                      |
| CPA1-2     | K+                | 9.0                           | 75                                       | 3.85±0.72                      |
|            | Na+               | 9.0                           | 82                                       | 2.96±0.32                      |

<sup>a</sup>Antiporter assays were performed in everted membrane vesicles using *E. coli* cells which were transformed with inducible pBad vector with cloned *S. aureus* *cpa1-1* and *cpa1-2* genes and taking empty vector controls. 2.5 mM tris-succinate was used in assay buffer to energize respiratory chain generating PMF.

<sup>b</sup>Assay were conducted on pH range 7.0 to 9.5 using NaCl and KCl. Assay pH on which CPA1-1 and CPA1-2 exhibited maximum dequenching was considered as optimal.

<sup>c</sup> $K_m$  values ( $\pm$  standard deviation) were calculated as average of three independent set of experiment that was conducted in duplicate with freshly prepared membrane vesicles from pregrown culture.

| Strain or plasmid                      | Description                                                             | Reference or source |
|----------------------------------------|-------------------------------------------------------------------------|---------------------|
| Newman                                 | Wild type (Clinical isolate)                                            | (32)                |
| RN4220                                 | Restriction deficient intermediate strain                               | (33)                |
| $\Delta cpa1-1$                        | Markerless deletion of <i>cpa1-1</i> in Newman (Locus tag NWMN_0600)    | This study          |
| $\Delta cpa1-2$                        | Markerless deletion of <i>cpa1-2</i> in Newman (Locus tag NWMN_2338)    | This study          |
| $\Delta cpa1-1\Delta cpa1-2$           | Markerless deletion of <i>cpa1-1</i> and <i>cpa1-2</i> in Newman        | This study          |
| $\Delta mnhA1cpa1-1$                   | Markerless deletion of <i>cpa1-1</i> in $\Delta mnhA1$ strain           | This study          |
| $\Delta mnhA1cpa1-2$                   | Markerless deletion of <i>cpa1-2</i> in $\Delta mnhA1$ strain           | This study          |
| $\Delta cpa2$                          | Markerless deletion of <i>cpa2</i> in Newman (Locus tag NWMN_0880)      | This study          |
| $\Delta mnh1$                          | Markerless deletion of <i>mnhA1</i> in Newman (Locus tag NWMN_0822)     | (18)                |
| $\Delta mnh2$                          | Markerless deletion of <i>mnhA2</i> in Newman (Locus tag NWMN_0593)     | (18)                |
| $\Delta nhaC1$                         | Markerless deletion of <i>nhaC1</i> in Newman (Locus tag NWMN_2200)     | This study          |
| $\Delta nhaC2$                         | Markerless deletion of <i>cpa1-1</i> in Newman (Locus tag NWMN_2227)    | This study          |
| $\Delta nhaC3$                         | Markerless deletion of <i>nhaC3</i> in Newman (Locus tag NWMN_0813)     | This study          |
| $\Delta nhaC1\Delta nhaC3$             | Markerless deletion of <i>nhaC3</i> in $\Delta nhaC1$                   | This study          |
| $\Delta nhaC1\Delta nhaC2\Delta nhaC3$ | Markerless deletion of <i>nhaC2</i> in $\Delta nhaC1\Delta nhaC3$       | This study          |
| $\Delta mnhA1\Delta nhaC1$             | Markerless deletion of <i>nhaC1</i> in $\Delta mnhA1$                   | This study          |
| $\Delta mnhA1\Delta nhaC3$             | Markerless deletion of <i>nhaC3</i> in $\Delta mnhA1$                   | This study          |
| <i>E. coli</i> KNabc                   | $\Delta nhaA \Delta nhaB \Delta chaA$ (derived from <i>E. coli</i> TG1) | (34)                |
| DH5 $\alpha$ -TI <sup>R</sup>          | Competent cells for site-directed mutagenesis                           | Invitrogen          |

| Strain and Primer name | Sequence                                |      |
|------------------------|-----------------------------------------|------|
| Top 10                 | Transformation strain                   | (35) |
| pMAD                   | <i>E. coli/S. aureus</i> shuttle vector | (36) |
| pBAD                   | <i>E. coli/S. aureus</i> shuttle vector | (23) |
| pOS1                   | <i>S. aureus</i> shuttle vector         | (37) |

**Table 3:** Bacterial strains and plasmid used in this study

---

*cpa1-1* knockout:  
cpa1-1 upF ATAGGATCCTGCTGCTGTGATGTTGTTGTT  
cpa1-1 upR GCCCTTCAGTTTTTCATCAATCCTTCCAAACTTTACCTCTCTAAAAA  
cpa1-1 dnF TTTTTAGAGAGGTGAAAGTTTGGAAGGATTGATGAAAACTGAAGGGC  
cpa1-1 dnR ATAACGCGTGTGGTTTTGATTAACCTGCGA

*cpa1-2* knockout:  
cpa1-2 upF ATAGGATCCTGCTGGTGAAACGAAAGATCC  
cpa1-2 upR ACGGGGGTATTGTTATGTCTTGCTGAACTGATACTAGAGCGAGATGT  
cpa1-2 dnF ACATCTCGCTCTAGTATCAGTTCAGCAAGACATAACAATACCCCGT  
cpa1-2 dnR ATAGAATTCTCCATTGTATGCGGTTGGTGTA

*cpa2* knockout:  
cpa2 upF ATAGGATCCCGACCAAGAAGATGTTGCTC  
cpa2 upR CGCAATTGTGTATCTCCATGTCTGATTGACAATTATTGGAG  
cpa2 dnF CTCCAATAATTGTCAATCGACATGGAGATACACAATTGCG  
cpa2 dnR ATAGAATTCGTGGAATCCGCTATCTACATG

*nhaC1* knockout:  
nhaC1 upF CAACACCTGCAGCGAATACAATGTGGCATATGCTGAGGCAA  
nhaC1 upR ATAGAATTGCTGGCGAGTTCGCTTTATATAA  
nhaC1 dnF ATAGGATCCCAGCCATTGACACACCCAAA  
nhaC1 dnR TTGCCTCAGCATATGCCACATTGTATTCGCTGCAGGTGTTG

*nhaC2* knockout:  
nhaC2 upF ATAGGATCCTGATTTAATGGCCTTGAGCCT  
nhaC2 upR TGTGGCGTTGTTTTTAGGCGGCCAAGTAAGGTGGCTTGTT  
nhaC2 dnF AACAAAGCCACCTTACTTGGCCGCCTAAAAACAACGCCACA  
nhaC2 dnR ATAGAATTCACATTCGAAACGATCGCAACT

*nhaC3* knockout:  
nhaC3 upF ATAGGATCCTGCTACATTAACGGGTGCAG  
nhaC3 upR CGAAGCCCCACCATGTAAATCACCTGTCAATAGCAAACCTATACCA  
nhac3 dnF TGGTATAGTTTGCTATTGACAGGTGATTTACATGGTGGGGCTTCG  
nhaC3 dnR ATAGAATTCCGTTTCGCGTTGTACAATGGC

qPCR Primers  
cpa1-1 F TCCAACGACTGAGAAACCACC  
cpa1-1R CGGTAACGTTAATGCGATTGCT  
cpa1-2F TCCAAACAGAGCCTGACAACT  
cpa1-2R ACCCAAACAATCGACATGC  
cpa2F ATCAATGGTCAAGGCGGCAG  
cpa2R TGCGTCGTACCATCCATCAAT  
nhaC1R GCTACAGTGCCAGCTATGCTAA  
nhaC2F ACCACCAATTAGCAACGCAAT  
nhaC2R AGCCGGAATCATTGGTCTCA  
nhaC3F CGGTTTTGGTTTTATGTTTCCCG  
nhaC3R CAATTGGGTGATTTGCCTTTGC  
mnhA1 F GCACCCGACTTAGCATTGAC  
mnhA1R ATGACGGACAAACCAACACC  
mnhA2F GCGGATATGCTCAACACCAA  
mnhA2R TCCCATGAAAAGCGCACA

---

**Table 4:** Primers used in this study
